# Supplementary material
Source: PubMed Central journal article supplement (PMC3431624)
Supplement: supp_M112.361865_jbc.M112.361865-4.pdf [file supp_M112.361865_jbc.M112.361865-4.pdf]

**Supplementary material (Petroi et al., 2012)**

**Supplementary videos.** Video 1: A30P-GFP. Video 2: TP-GFP. Live images were captured with a spinning disk confocal microscope at 1 sec intervals. The videos cover a total period of 1 or 2 min. The playback rate is 10x real time.
